Running head: TACS SUPRESSES BEHAVIORALLY RELEVANT GAMMA OSCILLATIONS

1 **Low-frequency alternating current stimulation rhythmically suppresses stimulus-induced**  
2 **gamma-band oscillations in visual cortex and impairs perceptual performance**

3 Jim D. Herring<sup>1</sup>, Sophie Esterer<sup>2,1</sup>, Tom R. Marshall<sup>3,1</sup>, Ole Jensen<sup>4,1</sup>, and Til O. Bergmann<sup>5,6,1</sup>.

4 1. Donders Institute, Radboud University Nijmegen, Nijmegen, the Netherlands

5 2. CUBRIC, School of Psychology, Cardiff University, Cardiff, United Kingdom

6 3. Department of Experimental Psychology, University of Oxford

7 4. School of Psychology, University of Birmingham, Birmingham, United Kingdom

8 5. Department of Neurology and Stroke, and Hertie Institute for Clinical Brain Research,  
9 University of Tübingen, Tübingen, Germany

10 6. Institute of Medical Psychology and Behavioral Neurobiology, University of Tübingen,  
11 Tübingen, Germany

12 Acknowledgements

13 This work was supported by The Netherlands Organization for Scientific Research, VICI Grant  
14 453-09-002, ALW Open Competition Grant 822-02-011.

15

16 Competing interests

17 The authors declare no competing interests

## TACS SUPPRESSES BEHAVIORALLY RELEVANT GAMMA OSCILLATIONS

### 18 **Abstract**

19 Alpha oscillations (8-12 Hz) are hypothesized to rhythmically gate sensory processing, reflected by  
20 activity in the 40-100 Hz gamma band, via the mechanism of pulsed inhibition. We applied transcranial  
21 alternating current stimulation (TACS) at individual alpha frequency (IAF) and flanking frequencies  
22 (IAF-4 Hz, IAF+4 Hz) to the occipital cortex of healthy human volunteers during concurrent  
23 magnetoencephalography (MEG), while participants performed a visual detection task inducing strong  
24 gamma-band responses. Occipital (but not frontal) TACS physically suppressed stimulus-induced gamma  
25 oscillations in the visual cortex and impaired target detection, with stronger phase-to-amplitude coupling  
26 predicting behavioral impairments. Frontal control TACS ruled out retino-thalamo-cortical entrainment  
27 resulting from (subthreshold) retinal stimulation. All TACS frequencies tested were effective, suggesting  
28 that visual gamma-band responses can be modulated by a range of low frequency oscillations. We  
29 propose that TACS-induced cortical excitability fluctuations mimic the mechanism of pulsed inhibition,  
30 which mediates the function of alpha oscillations in gating sensory processing.

31

32 *Keywords:* TACS, early visual cortex, gamma, alpha, oscillations, phase, inhibition

## TACS SUPPRESSES BEHAVIORALLY RELEVANT GAMMA OSCILLATIONS

### 33 **Introduction**

34 Cortical oscillations and their cross-frequency interaction constitute important mechanisms for the  
35 organization of neuronal processing. Alpha-band oscillations (8 – 12 Hz) are hypothesized to  
36 rhythmically gate information flow in the brain via the pulsed inhibition of sensory processing, reflected  
37 by local gamma-band oscillations (40 – 100 Hz) (Klimesch et al., 2007; Jensen and Mazaheri, 2010).  
38 Primarily, we aimed to test the specific hypothesis that the well-described stimulus-induced increase in  
39 gamma-band power in the visual cortex, associated with bottom-up visual processing (Bastos et al., 2015;  
40 Fries, 2015), can be actively modulated by the phase of slower oscillations, particularly in the alpha band.  
41 While correlational data from MEG studies in humans (Osipova et al., 2008) and intralaminar recordings  
42 in monkeys (Spaak et al., 2012) has revealed coupling between alpha phase and gamma amplitude, the  
43 causal role of alpha oscillations in modulating gamma-band power remains unresolved. We therefore  
44 applied transcranial alternating current stimulation (TACS) at individual alpha frequency (IAF) to the  
45 visual cortex (Oz-Cz montage) in human volunteers performing a visual detection task to mimic the  
46 impact of alpha phase-related cortical excitability fluctuations on endogenous gamma activity during  
47 visual stimulus processing. A second goal of this study was to test (i) whether TACS is capable of  
48 modulating behaviorally relevant neuronal activity in the human brain at commonly used stimulation  
49 intensities, an assumption recently called into question by modelling work (Opitz et al., 2016) and  
50 cadaver studies (Underwood, 2016), and (ii) whether its effect can be attributed to transcranial as opposed  
51 to mere retinal stimulation (Schutter, 2015). While simultaneous TACS-EEG recordings (Helfrich et al.,  
52 2014a; Helfrich et al., 2016) are limited by the spatial interference of stimulation and recording electrodes,  
53 both affixed to the scalp, the combination of TDCS/TACS and MEG (Soekadar et al., 2013; Neuling et al.,  
54 2015; Witkowski et al., 2015; Marshall et al., 2016) allowed us to transcranially impose oscillating  
55 currents on the visual cortex, while assessing stimulus-induced gamma power modulation in the visual  
56 cortex directly underlying the TACS electrodes (Oz-Cz montage). Using a combination of spatial filtering  
57 and TACS artifact suppression techniques, we extracted gamma-band oscillatory signals from the visual

## TACS SUPPRESSES BEHAVIORALLY RELEVANT GAMMA OSCILLATIONS

58 cortex during TACS and estimated cross-frequency TACS-phase-to-gamma-amplitude-coupling. To  
59 control for the potential impact of electrical stimulation of the retina and resulting retino-thalamo-cortical  
60 entrainment, we also applied TACS with a frontal stimulation montage (Fpz-Cz). To further assess the  
61 frequency-specificity of TACS-phase-gamma-amplitude-coupling, we applied TACS at two flanker  
62 frequencies of IAF -4 Hz and IAF +4 Hz. We hypothesized that occipital TACS (but not frontal control  
63 TACS) at alpha frequency should impose rhythmic excitability fluctuations in the visual cortex,  
64 mimicking the effects of spontaneous alpha oscillations. Occipital TACS was therefore expected to cause  
65 a general decrease and, more specifically, a rhythmic suppression of visual stimulus-induced gamma  
66 power, and consequently a reduction of bottom-up visual stimulus processing and associated perceptual  
67 detection performance.

68

### 69 **Results**

70 Participants performed a forced-choice visual discrimination task in which they had to report the rotation  
71 direction of a foveally presented asterisk inside an inward moving high-contrast grating (Figure 1A),  
72 known to produce a pronounced gamma oscillatory response in early visual cortex (Hoogenboom et al.,  
73 2006b). During each trial, we applied TACS in either a visual (Oz-Cz) or a frontal (Fpz-Cz) montage and  
74 at either of three frequencies (i.e., IAF -4 Hz, IAF, +4 Hz; Figure 1B,C) while recording ongoing brain  
75 oscillatory activity using whole-head magnetoencephalography (Figure 1). Sham trials were intermingled  
76 as TACS-free reference epochs. Data from 15 of the 17 participants is reported here, as two showed no  
77 detectable gamma band response even in TACS-free Sham trials.

78

## TACS SUPPRESSES BEHAVIORALLY RELEVANT GAMMA OSCILLATIONS

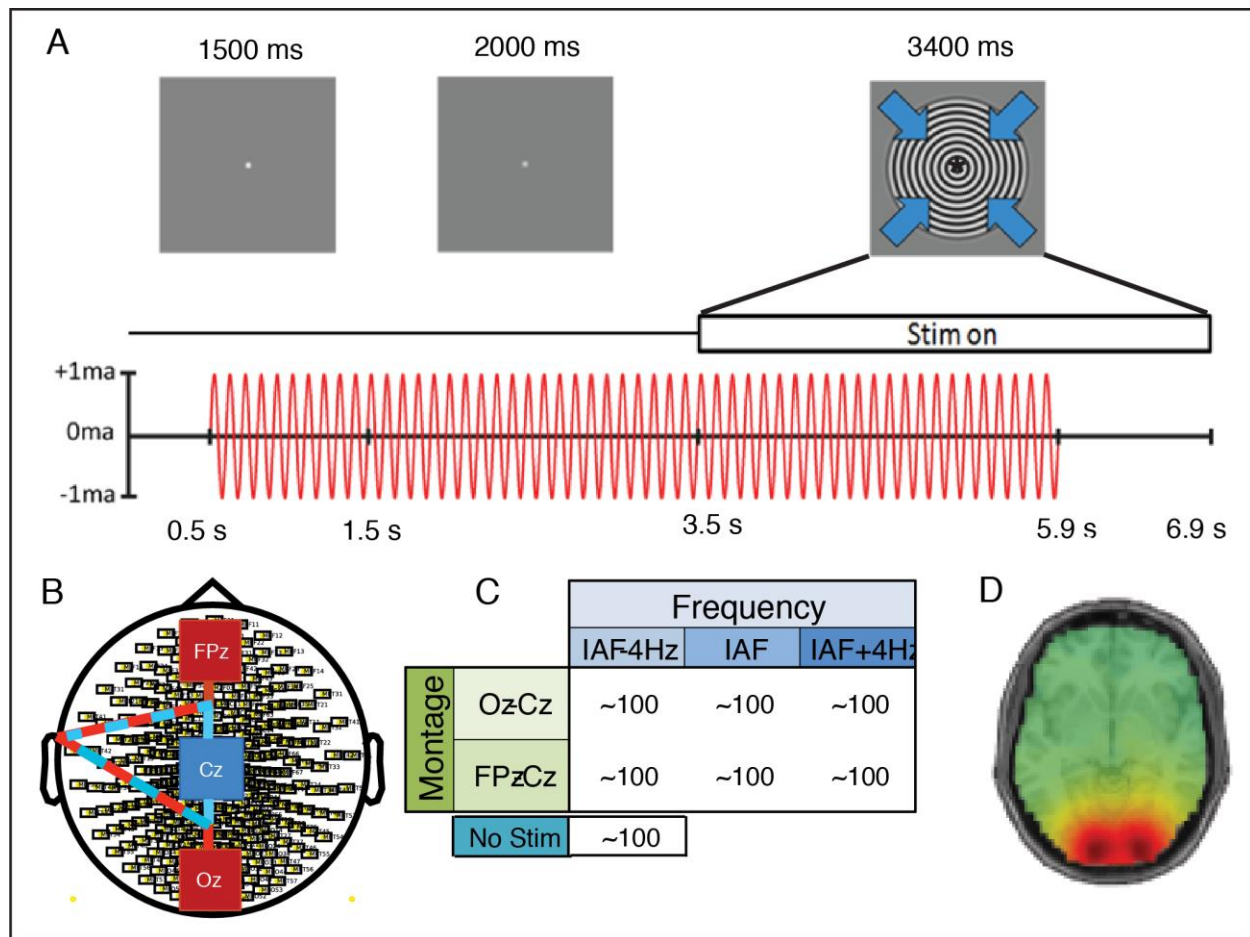

79

80 **Figure 1. Experimental paradigm and setup.** (A) Timeline of a single trial. Participants fixated a small white dot  
 81 in the center of the screen and were allowed to blink, until 1500 ms later the white dot turned grey to indicate the  
 82 end of the blink period. At 3500 ms an inward-moving grating appeared around the fixation dot, which contained a  
 83 slowly rotating asterisk in its center. Participants had to report the direction of rotation, by button-press, as soon as  
 84 the visual stimulus disappeared at 5900 ms and before the next trial started at 6900 ms. TACS was turned on 500 ms  
 85 into the blink period and turned off 2400 ms after visual stimulus onset and 1000 ms before visual stimulus offset,  
 86 thus lasting for 5400 ms each trial. (B) TACS electrode montage. TACS was applied via three 5 x 5 cm rubber  
 87 electrodes attached in a dual-montage setup: an occipital montage with electrodes located at Oz and Cz, and a frontal  
 88 montage with electrodes at Fpz and Cz, with electrode Cz used in both montages. The cables connected to the  
 89 electrodes were twisted at the shortest possible distance and lead left-ward away from the head towards the shoulder  
 90 and out of the MEG helmet. (C) Experimental design matrix. Seven different trial conditions were pseudorandomly  
 91 intermingled: 2 montages (frontal, occipital) x 3 frequencies (IAF, IAF -4 Hz, IAF + 4 Hz) plus one stimulation-free  
 92 condition), with ~100 trials per condition, i.e. ~700 trials in total. Due to limitations in total stimulation duration per  
 93 day (defined by the local ethics committee) the experiment was split into two sessions of ~350 trials each, separated  
 94 by at least 1 day. (D) Group average topography of stimulus-induced gamma-band power in source space (DICS  
 95 frequency domain beamforming). Virtual channels were extracted (LCMV time domain beamforming) from the 10  
 96 voxels in visual cortex showing the highest relative increase in gamma-band power from baseline.

97

## TACS SUPPRESSES BEHAVIORALLY RELEVANT GAMMA OSCILLATIONS

### 98 **Occipital TACS suppressed average gamma power**

99 Gamma power was extracted at individual's gamma peak frequency (see Methods; see Figure 1D for  
100 group average gamma power). Average gamma peak frequency was  $57.6 \text{ Hz} \pm 8.5 \text{ Hz}$  (mean  $\pm$  SD). In all  
101 conditions, a significant increase in gamma-band power was observed during visual stimulus presentation  
102 (one-sample t-tests, all  $p < 0.001$ ; Table S1). Importantly, visual stimulus-induced gamma responses  
103 differed between TACS montages as revealed by the main effect of a *montage* (occipital, frontal, sham) x  
104 *frequency* (IAF-4, IAF, IAF+4 Hz) rmANOVA ( $F_{1.3,18.9} = 26.08$ ;  $p < 0.001$ ), in that occipital TACS  
105 caused a stronger suppression of the gamma response than frontal TACS (paired-samples t-test averaged  
106 across TACS frequencies:  $t_{14} = -9.15$ ,  $p_{\text{bonf}} < 0.001$ ; see Figure 2A, S2, and S3). In fact, only occipital  
107 TACS ( $t_{14} = -7.59$ ,  $p_{\text{bonf}} < 0.001$ ) but not frontal control TACS ( $t_{14} = -0.40$ ,  $p_{\text{bonf}} = 1$ ) caused a decrease in  
108 gamma power compared to Sham trials, excluding a confound by retinal stimulation. There was no  
109 significant main effect for TACS frequency ( $F_{2,28} = 2.80$ ,  $p = 0.08$ ) but a significant interaction between  
110 montage and frequency ( $F_{4,56} = 4.38$ ,  $p = 0.004$ ), driven by occipital TACS causing a larger suppression of  
111 gamma-band power for the IAF-4 Hz compared to IAF + 4 Hz conditions ( $t_{14} = -4.18$ ,  $p = <0.001$ ),  
112 whereas frequencies did not differ for frontal TACS or Sham (all  $p > 0.1$ ).

113

## TACS SUPPRESSES BEHAVIORALLY RELEVANT GAMMA OSCILLATIONS

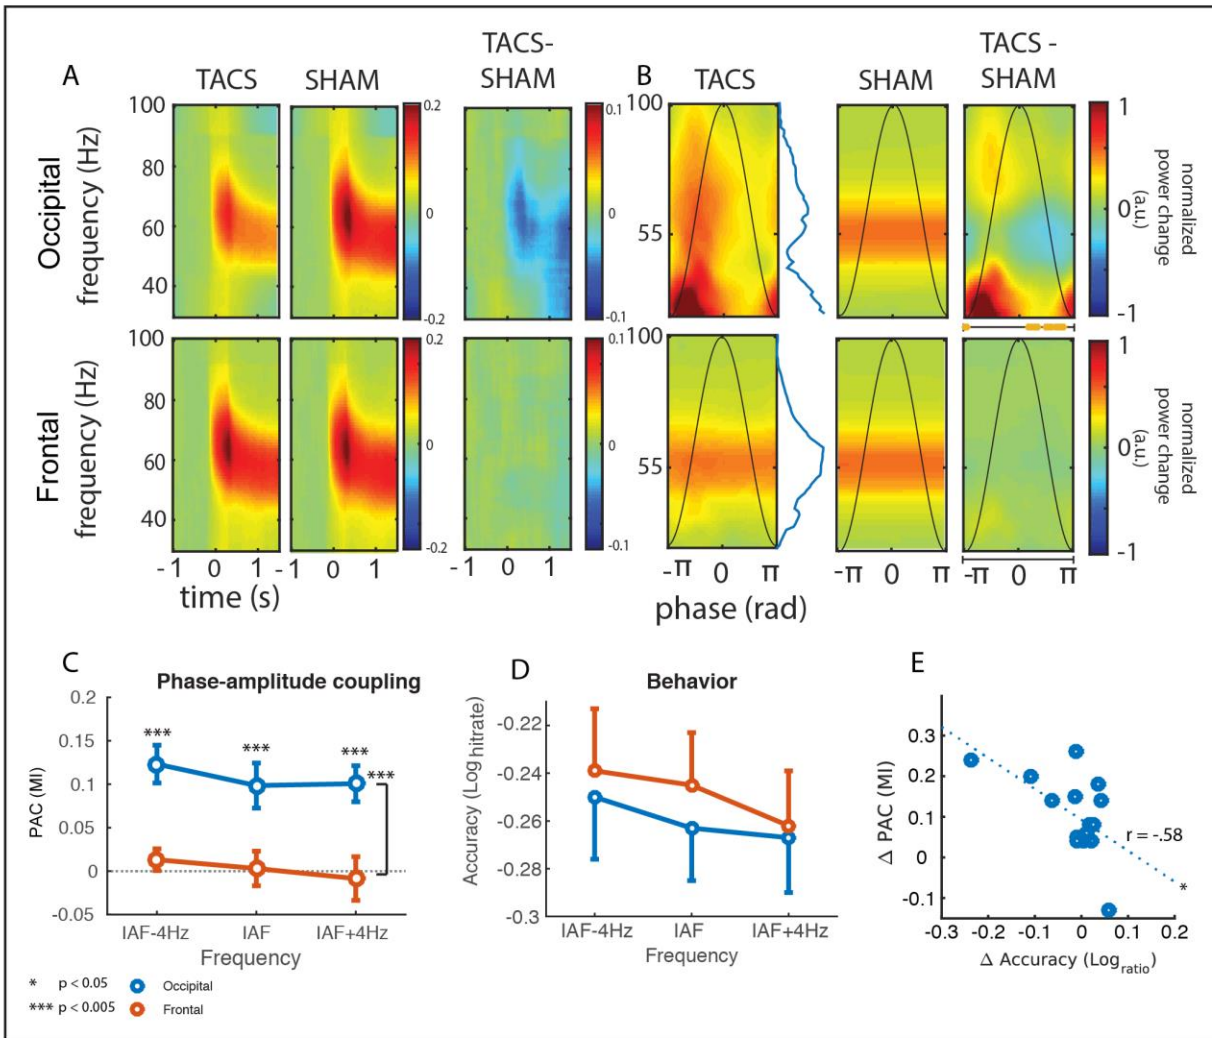

114

115 **Figure 2. Occipital TACS rhythmically suppressed stimulus-induced gamma oscillations.**  
 116 (A) Time-frequency representations (TFR) of oscillatory power timelocked to visual stimulus onset for IAF TACS  
 117 (TACS) vs. TACS-free trials (Sham) (see Figure S2 for separate analyses of different TACS frequencies). Occipital  
 118 TACS caused a stronger suppression of the gamma response than frontal TACS ( $p < 0.001$ ), and only occipital but  
 119 not frontal TACS decreased gamma power compared to Sham trials (all  $p < 0.001$ ; Table S2). (B) TFRs as in A, but  
 120 segmented and averaged timelocked to TACS peaks and with the x-axis normalized to phase-angles in radians (see  
 121 Figure S4 for separate analyses of all frequencies). Inset curves represent the TACS cycle. Occipital TACS  
 122 phasically suppressed stimulus-induced gamma-band activity relative to Sham TACS (orange bars underneath TFR  
 123 indicate significant difference from zero,  $p_{FDR} < 0.05$ ), whereas frontal TACS did not show any PAC relative to  
 124 Sham. (C) Phase-amplitude coupling (PAC, as indexed by the ‘modulation index’, MI; Tort et al., 2006) between  
 125 the phase of TACS and the amplitude of the stimulus-induced gamma power during visual stimulus presentation  
 126 (after subtraction of PAC during TACS in pre-visual-stimulus baseline and surrogate PAC to control for the  
 127 potential impact of residual TACS artefacts on PAC). PAC was larger for occipital TACS (blue) than for frontal  
 128 TACS (orange) and for surrogate data for all TACS frequencies (all  $p < 0.005$ ), whereas frontal TACS did not differ  
 129 from surrogates ( $p > 0.3$ ). See Figure S4 for periods before and during visual stimulation. (D) Accuracy on the  
 130 rotation- detection task was reduced for occipital compared to frontal TACS ( $p < 0.05$ ), irrespective of TACS  
 131 frequency. (E) The more the individual TACS-phase-gamma-amplitude-coupling differed between occipital and  
 132 frontal TACS, the stronger was the individual performance decrease in rotation detection for occipital relative to  
 133 frontal TACS ( $r_{16} = -0.58$ ;  $p < 0.05$ ).

134

## TACS SUPPRESSES BEHAVIORALLY RELEVANT GAMMA OSCILLATIONS

### 135 **Occipital TACS phase rhythmically modulated gamma power**

136 To test whether the net suppression actually resulted from a phasic modulation, or more specifically, a  
137 rhythmic suppression of gamma-band power by TACS phase, we calculated TACS peak-locked TFRs  
138 (Figure 2B; Figure S3). Visually induced gamma-band power was observed to decrease at particular  
139 points in the phase cycle, but not to increase at any point ( $p_{\text{FDR}} < 0.05$ ). In addition, there was a rhythmic  
140 increase around 40 Hz, as well as between 70 – 100 Hz for occipital, but not for frontal TACS between –  
141  $\pi$  and 0 ( $p_{\text{FDR}} < 0.05$ ). Although activity in the 40 Hz range is also visible in the non-peak-locked TFRs  
142 (Figure 2A), it is outside the range of the main gamma-band response. To more formally quantify the  
143 strength of phasic gamma power modulation, we assessed phase-amplitude coupling (PAC) between  
144 TACS phase and gamma-band power in the visual cortex by calculating Tort's Modulation Index (MI,  
145 Tort et al., 2010) both before and during visual stimulus presentation. We calculated the MI for each  
146 TACS condition at the individual peak-gamma frequency. For comparison, montage- and frequency-  
147 specific surrogate samples were created by phase-shifting the TACS signal from the respective TACS  
148 condition. PAC was significantly larger for occipital than for frontal TACS, as reflected by a significant  
149 main effect of montage (Figure 2C) during visual stimulation ( $F_{1,14} = 64.53$ ,  $p < 0.001$ ), but neither a main  
150 effect of frequency ( $p > 0.2$ ) nor an interaction ( $p > 0.6$ ). Importantly, this effect remained significant  
151 ( $F_{1,14} = 17.06$ ,  $p < 0.001$ ) after correcting for potentially spurious phase-amplitude coupling. To this end  
152 we subtracted PAC values calculated on the baseline period, which included TACS but lacked the visual  
153 stimulus-induced gamma response ( $\text{peri}_{\text{TACS}} - \text{pre}_{\text{TACS}}$ ). In addition, we calculated the same difference in  
154 PAC values for the surrogate data ( $\text{peri}_{\text{surrogate}} - \text{pre}_{\text{surrogate}}$ ), the result of which was subtracted from the  
155 respective TACS difference ( $(\text{peri}_{\text{TACS}} - \text{pre}_{\text{TACS}}) - (\text{peri}_{\text{surrogate}} - \text{pre}_{\text{surrogate}})$ ). In fact, only occipital ( $t_{14} = 5.23$ ,  $p$   
156  $< 0.001$ ) but not frontal TACS ( $t_{14} = 0.168$ ,  $p > 0.8$ ) showed significant PAC during visual stimulus  
157 presentation relative to baseline and relative to the respective effect in the PAC surrogates. Thus, ruling  
158 out retinal entrainment and spurious PAC due to residual artifacts, occipital TACS did indeed produce a  
159 phasic modulation of stimulus-induced gamma power that was comparable in strength across stimulation  
160 frequencies.



## TACS SUPPRESSES BEHAVIORALLY RELEVANT GAMMA OSCILLATIONS

161

### 162 **Occipital TACS decreases rotation discrimination**

163 Participants correctly identified the rotation direction in 78% of trials (SEM = 2%) with an average  
164 reaction time of 409 ms (SEM = 11 ms), for correct trials. There was a small, but significant decrease in  
165 hit rate for occipital (77.98%  $\pm$  2.66%) compared to frontal TACS (78.33%  $\pm$  2.26%) when taking into  
166 account the participant's baseline performance in Sham trials as a covariate in a 2 x 3 repeated-measures  
167 ANCOVA (montage x TACS frequency; see Figure 2D). We observed a main effect of montage ( $F_{1,15} =$   
168 5.81,  $p < 0.05$ ) and an interaction between montage and baseline performance in the Sham trials ( $F_{1,15} =$   
169 11.69,  $p < 0.01$ ). The interaction indicates that subjects performing better in the rotation discrimination  
170 task during Sham also showed stronger TACS-related impairment than weakly performing subjects, a  
171 relationship that is also reflected by the correlation between performance during Sham trials and  
172 performance reduction during occipital TACS relative to frontal control TACS ( $r_{16} = 0.66$ ,  $p < 0.01$ ).  
173 Importantly, the effect of TACS montage on behavioral performance was correlated with the effect of  
174 TACS montage on PAC ( $r_{13} = -.5753$ ,  $p < 0.05$ ; Figure 2E). In other words, subjects in which occipital  
175 TACS caused a stronger rhythmic suppression of stimulus-induced gamma-band activity (compared to  
176 frontal control TACS) also suffered from stronger performance impairment in the rotation discrimination  
177 task for occipital TACS (compared to frontal control TACS) (Figure 2E).

178

### 179 **Discussion**

180 The aim of this study was to test a core prediction of the *pulsed inhibition hypothesis* (Klimesch et al.,  
181 2007; Jensen and Mazaheri, 2010), namely that the phase of slower oscillations, particularly in the alpha  
182 band, modulates the bottom-up processing of sensory information, which is reflected by stimulus-induced  
183 gamma-band oscillations (Bastos et al., 2015; Fries, 2015), and thereby affects perceptual performance. In  
184 line with this notion, we found that TACS to the occipital cortex (but not frontal control TACS)  
185 rhythmically suppressed visual stimulus-induced gamma-band power and that the degree of this

## TACS SUPPRESSES BEHAVIORALLY RELEVANT GAMMA OSCILLATIONS

186 suppression predicted the reduction in visual detection performance. The rhythmic fluctuations in visual  
187 cortex excitability imposed by TACS therefore seems to (by means of entrainment or otherwise) mimic  
188 the mechanism of *pulsed inhibition* proposedly constituted by spontaneous alpha oscillations, thus  
189 recreating the functional effects of alpha oscillations on sensory processing.

190

### 191 **TACS rhythmically suppresses visual-induced gamma power**

192 The net suppression of visually induced gamma power by occipital TACS (Figure 2A) ties in well with  
193 the observed phase-specific decrease (but not increase) in gamma power (Figure 2B), suggesting that the  
194 corresponding excitability fluctuations imposed on the visual cortex by occipital TACS may be  
195 asymmetric, just as has been proposed for spontaneous alpha-band oscillations (Jensen and Mazaheri,  
196 2010; Schalk, 2015). Notably, TACS at neighboring frequencies 4 Hz slower or faster than individual  
197 alpha frequency also caused a net suppression (Figure 2A) and rhythmic modulation (Figure 2C) of  
198 stimulus-induced gamma responses (with the lowest TACS frequency even causing the strongest net  
199 suppression). There are three potential explanations for the lack of frequency-specificity with respect to  
200 phase-amplitude coupling: Firstly, TACS at neighboring frequencies 4 Hz away from individual peak  
201 frequency may have still been able to entrain ongoing spontaneous alpha oscillations (Helfrich et al.,  
202 2014a; Antal and Herrmann, 2016). This would be in line with the targeted oscillatory network showing  
203 resonance properties reflecting an Arnold Tongue, according to which stimulation slightly off the  
204 endogenous frequency can still cause entrainment if applied at higher intensities (Ali et al., 2013).  
205 Secondly, TACS at neighboring frequencies may have entrained high theta band and low beta band  
206 oscillations instead, both of which phasically modulate gamma power in the visual cortex (Bastos et al.,  
207 2015; Fries, 2015). Thirdly, transcranial currents may have directly imposed excitability fluctuations at  
208 stimulation frequency on relevant visual cortex neurons by merely mimicking the functional aspect of  
209 endogenous low-frequency neuronal oscillations without the 'entrainment' of an already ongoing  
210 endogenously generated oscillation. While the current study cannot rule out any of these explanations, the  
211 latter explanation may be favorable as it requires the least assumptions. Our findings are complemented

## TACS SUPPRESSES BEHAVIORALLY RELEVANT GAMMA OSCILLATIONS

212 by work from Helfrich et al. (2016), who reanalyzed an earlier TACS-EEG dataset (Helfrich et al., 2014b)  
213 and found increased cross-frequency coupling between spontaneous alpha oscillations (8-12 Hz band) and  
214 task-related gamma band activity during 10 Hz TACS compared to sham. While these results support the  
215 idea that TACS at 10 Hz can facilitate alpha-band to gamma coupling, they did not resolve at that time  
216 whether gamma was entrained at the precise TACS frequency, and whether retinal entrainment may have  
217 been involved, two issues we explicitly addressed in this study.

218

### 219 **TACS related gamma modulation is behaviorally relevant**

220 Occipital TACS compared to frontal control TACS caused a small but significant impairment in visual  
221 detection performance, which can, importantly, not be attributed to retinal stimulation. Beyond that,  
222 subjects showing a stronger TACS related modulation of gamma power also showed stronger drops in  
223 visual accuracy. Thus, as predicted by the *pulsed inhibition hypothesis*, phasic suppression of stimulus-  
224 related gamma oscillations suppressed bottom-up neuronal processing and thus impaired perception.  
225 Importantly, the behavioral relevance of TACS-related neuronal activity modulations already shows that  
226 the observed neuronal effects cannot be attributed to residual artifacts.

227

### 228 **TACS effects cannot be explained by subthreshold retinal entrainment or residual artifacts**

229 One of the key challenges in studies using TACS is not only the current flow to unintended brain regions,  
230 but also to extracranial neuronal structures, such as the retina, which is particularly sensitive to  
231 stimulation; TACS easily excites the retina and induces retinal phosphenes, i.e., a sensation of flickering  
232 light at stimulation frequency (Schutter, 2015). Importantly, even stimulation intensities below phosphene  
233 threshold may entrain visual cortex activity via the retino-thalamo-cortical pathway, explaining why even  
234 subconscious intermittent photic stimulation can produce cognitive effects (for a review see Schutter,  
235 2015). To exclude this potential confound, we included a control montage (Fpz-Cz) with the frontal  
236 electrode even closer the eyes and matched the stimulation intensity on the retina for both montages by  
237 independently adjusting it to 80 % of the subjects' individual phosphene threshold. This ensured that (i)

## TACS SUPPRESSES BEHAVIORALLY RELEVANT GAMMA OSCILLATIONS

238 no retinal phosphenes were induced throughout the experiment, and (ii) the amount of effective current  
239 reaching the retina was comparable between montages, while only the occipital montage exerted a direct  
240 transcranial impact on the visual cortex. Indeed, we did not observe any effect of the frontal control  
241 TACS on either behavior, or on phase-amplitude coupling with gamma band power, or on the relationship  
242 between both. This demonstrates that the behaviorally relevant modulatory effects of occipital TACS  
243 observed in the current experiment are not explained by indirect retino-thalamo-cortical but rather by  
244 direct transcranial cortical entrainment.

245 A second challenge for TACS studies in combination with EEG or MEG are the enormous  
246 stimulation artifacts that contaminate the recordings, particularly at the stimulation frequency but also at  
247 its harmonics, as well as at heartbeat- and respiration-related side bands (Noury et al., 2016; Noury and  
248 Siegel, 2017). While beamformer spatial filter techniques (like the one used in the current study) can  
249 considerably attenuate the artifact when correctly parameterized (Neuling et al., 2017), they may not be  
250 able to remove it completely due to its non-linearity (Noury et al., 2016) and mathematical constraints  
251 related to (un-)correlated sources (Mäkelä et al., 2017). In the current study, we deliberately circumvent  
252 most of these issues by focusing entirely on the effects of low-frequency TACS on high-frequency  
253 stimulus-induced gamma power. Importantly, we applied identical artifact removal procedures to all  
254 TACS montages, TACS frequencies, and created respective frequency-specific Sham conditions (see  
255 Methods for details). Moreover, TACS periods before and during visual stimulation (containing the same  
256 amount of residual TACS artifacts) were contrasted to determine induced gamma response (see Methods  
257 for details), an approach for which exists consensus that it effectively controls for residual TACS artifacts  
258 (Neuling et al., 2017; Noury and Siegel, 2017). We are thus confident that none of the reported findings  
259 can be attributed to TACS artifacts systematically confounding power or PAC estimates.

260

### 261 **General implications for TACS-MEG/EEG research**

262 Given the increasing use of TACS and TDCS for the non-invasive modulation of neuronal activity and  
263 cognitive function on the one hand, and the recent criticism regarding replicability (Horvath et al., 2014,

## TACS SUPPRESSES BEHAVIORALLY RELEVANT GAMMA OSCILLATIONS

264 2015), effectiveness of commonly applied current intensities (but see Opitz et al., 2016; Underwood,  
265 2016; Opitz et al., 2017), and confounds by peripheral (e.g., retinal) entrainment (Schutter, 2015) on the  
266 other hand, our findings have important implications reaching beyond the specific research question of  
267 the present study. Numerous studies (e.g., Pogosyan et al., 2009; Joundi et al., 2012; Neuling et al., 2012;  
268 Brittain et al., 2013; Helfrich et al., 2014a; Cecere et al., 2015; Alekseichuk et al., 2016) have provided  
269 compelling behavioral evidence that TACS does affect human brain function. However, due to the  
270 massive presence of TACS artifacts in EEG/MEG recordings (see above), direct assessment of a TACS-  
271 related phase-dependent modulation of neuronal activity at the stimulation frequency is inherently  
272 problematic (Bergmann et al., 2016). In contrast, by investigating TACS-phase-to-gamma-power-  
273 coupling, we could demonstrate that TACS is indeed able to rhythmically suppress visual stimulus-  
274 induced gamma oscillations in a behaviorally relevant manner, while ruling out retinal entrainment or  
275 residual artifacts as alternative explanation. This implicates that, if adequately controlled, TACS-MEG at  
276 common stimulation intensities is a powerful tool to study and manipulate oscillatory brain activity and  
277 behavioral performance non-invasively in humans.

278

### 279 **Methods**

#### 280 **Participants**

281 All participants were recruited from a database of the Radboud University Nijmegen. In total, 17  
282 participants (5 males, 12 females, age:  $24.3 \pm 0.7$  (mean  $\pm$  SEM)) with normal, or corrected-to-normal  
283 vision by contact lenses only, were included in the study. All participants conformed to standard inclusion  
284 criteria for MRI, MEG, and TACS. Written informed consent was obtained prior to start of the  
285 experiment according to the Declaration of Helsinki. The study was approved by the local ethics  
286 committee. Participants were financially compensated at 10 Euros per hour. Data are reported from 15  
287 participants; two participants had to be excluded since no visual stimulus-induced gamma-band response  
288 could be detected even during Sham periods.

## TACS SUPPRESSES BEHAVIORALLY RELEVANT GAMMA OSCILLATIONS

289

### 290 **Procedure**

291 To gather a sufficient amount of trials, participants took part in two experimental sessions on two separate  
292 days, but with all experimental conditions tested in each session. A structural MRI was obtained on a  
293 separate day. In the beginning of the first session, participants were familiarized with the experimental  
294 task. Otherwise, both experimental sessions followed the same procedures: After TACS and ECG  
295 electrodes were applied, participants were familiarized with the stimulation, and individual stimulation  
296 intensity was determined. Then, participants were seated in the MEG, and four minutes of resting state  
297 data were collected (two minutes eyes-open, two minutes eyes-closed) before they performed a rotation-  
298 detection task in blocks of 10 minutes with short breaks in between. Total MEG time was 90 min per  
299 session.

300

### 301 **Rotation detection task**

302 Participants performed a rotation detection task in which they had to indicate by button-press the rotation  
303 direction of an asterisk in the center of an inward moving high-contrast grating (Figure 1A). Participants  
304 were instructed to fixate a white dot on grey background in the center of the screen. Each trial started with  
305 a 1.5 s period in which participants were allowed to blink. Participants were asked to refrain from  
306 blinking as soon as the fixation dot turned grey. A 'baseline' period of two seconds followed after which  
307 an inward-moving (0.8 degree/second) black-and-white high contrast grating with concentric circles (2.5  
308 cycles/degree) appeared on screen covering 8 degrees of visual angle (adapted from Hoogenboom et al.,  
309 2006a) for 3.4 seconds. In the center of the inward moving grating an asterisk was present that slowly  
310 rotated either clock-wise or counter-clock wise. The rotation rate was continuously updated after each  
311 trial using an adaptive-staircase procedure (Watson and Pelli, 1983) so that participants were roughly  
312 80% correct in detecting rotation direction. The goal of the task was to keep the participants fixated and  
313 assure a stable level of attention throughout the experiment, as well as to assess TACS effects on foveal  
314 detection accuracy.

## TACS SUPPRESSES BEHAVIORALLY RELEVANT GAMMA OSCILLATIONS

315

### 316 **TACS**

317 TACS was applied using a battery-driven NeuroConn DC+ stimulator (neuroConn GmbH, Ilmenau,  
318 Germany) connected to three 5 x 5 cm conductive, non-ferromagnetic rubber electrodes that were  
319 attached to the scalp following the international 10-20 system, creating an occipital montage (Oz-Cz) and  
320 a frontal montage (Fpz-Cz), which shared electrode Cz (Figure 2B). The surface area of the scalp was  
321 thoroughly cleaned using alcohol and Nuprep skin preparation gel (Weaver and Company, Aurora, CO,  
322 USA). Then electrodes were attached using conductive Ten20 paste (Weaver and Company, Aurora, CO,  
323 USA) ensuring no paste was applied outside of the contact area of the electrodes (Marshall et al., 2016).  
324 Impedances were kept below 5 kOhm. Due to the stickiness of the paste no further mounting aids were  
325 required. Electrode cables were connected in a manner that minimized the size of the current loop formed  
326 on the scalp. Cables for the Oz-Cz montage were connected to the anterior side of electrode Oz, and to the  
327 posterior side of electrode Cz. Cables for the Fpz-Cz montage were connected to the posterior side of  
328 electrode FPz, and the anterior side of electrode Cz. Switching between montages was handled by  
329 galvanically isolated switchbox that was controlled by the stimulation PC.

330 Several steps were taken to minimize the artifacts produced by the presence of additional material  
331 in the magnetically shielded room (MSR). First, all electrodes and cables, including connectors, were  
332 checked for ferromagnetic properties by moving the items inside the helmet while inspecting the effects  
333 on the MEG signal (several rubber electrodes had to be dismissed as they produced artifacts in the MEG  
334 signal). Second, a CAT6 electronically shielded cable connected the electrodes to the stimulator, which  
335 was located outside the MSR. The cable was fixed to the chair in the MSR to minimize movement. Third,  
336 the cables attached to the scalp were twisted for each montage to keep the resulting current loop as small  
337 as possible. The cables attached to the scalp ran left of the subject, fixed to the shoulder, downwards  
338 towards the chair, and away from the helmet.

339 Stimulation frequency was adjusted per participant based on the individual alpha frequency. To  
340 this end, the individual alpha frequency (IAF) was determined, with a resolution of 0.2 Hz, at the

## TACS SUPPRESSES BEHAVIORALLY RELEVANT GAMMA OSCILLATIONS

341 beginning of each session as the peak frequency of the difference in power spectra between an eyes-  
342 closed and eyes-opened resting state session ( $10.31 \pm 0.41$  Hz, mean  $\pm$  SD across subjects). During the  
343 experiment, stimulation frequency was set for each trial to either IAF -4Hz, IAF, or IAF +4 Hz (Figure  
344 2C). These two flanker frequencies at 4 Hz below and above IAF were chosen to explore the frequency  
345 specificity of the stimulation while still being sufficiently close to the alpha-band not to target  
346 neighboring functionally relevant frequency bands (i.e., the theta- or beta-band).

347 Stimulation intensity was titrated at the beginning of each session to 90% of the individual retinal  
348 phosphene threshold, separately per montage (peak-to-peak TACS amplitude for Oz-Cz:  $963 \pm 319$   $\mu$ A  
349 and Fpz-Cz:  $231 \pm 114$   $\mu$ A; mean  $\pm$  SD, range for Oz-Cz: 450 – 1750  $\mu$ A, for FPz-Cz: 50 – 550  $\mu$ A).  
350 Retinal phosphene threshold was determined by increasing the current strength of TACS at IAF from 100  
351 mA in steps of 100 mA until the participants started to perceive retinal phosphenes. Note that stimulation  
352 intensity was adjusted per montage, since the goal of the frontal montage was to control for retinal  
353 stimulation effects by increasing the proximity to the retina, while decreasing the proximity to the  
354 occipital cortex, ensuring that the current effectively stimulating the retina was comparable between  
355 montages. The frontal montage was not meant to effectively stimulate the frontal cortex (in which case  
356 higher stimulation intensities would have been required). The choice of subthreshold intensity for both  
357 montages ensured that no visual phosphene perception interfered with (i) the transcranial stimulation  
358 effects, (ii) the visual stimulus-induced gamma responses, and (iii) the detection task performance.

359 During each trial (except for Sham trials), TACS was applied for  $\sim 5.4$  s at one of the three frequencies  
360 (IAF -4Hz, IAF, or IAF +4 Hz) and via one of the two montages (occipital Oz-Cz or frontal Fpz-Cz)  
361 (Figure 1C). Stimulation started 1 s before the baseline period to allow for a build-up of potential  
362 entrainment effects and continued throughout the 2 s baseline period into the visual stimulus presentation  
363 period. The stimulation was turned off 2.4 seconds into the visual stimulation period after completing a  
364 full number of cycles at the particular stimulation frequency. In total, 700 trials (600 TACS trials +  
365 100 Sham trials) were acquired per subject, distributed over two sessions (resulting in a total stimulation  
366 time of 27 min per session.), and pseudo-randomized in order (i.e., all seven experimental conditions



## TACS SUPPRESSES BEHAVIORALLY RELEVANT GAMMA OSCILLATIONS

367 randomly applied within each consecutive block of seven trials) to ensure that an equal amount of trials of  
368 each condition was completed after every session and that there would be no more than two direct  
369 repetitions of the same TACS condition.

370

### 371 **MEG data acquisition**

372 Whole-head MEG was recorded using a 275-channel axial gradiometer CTF system (CTF MEG systems,  
373 VSM MedTech Ltd.) sampling at 1200 Hz, with a hardware low pass filter at 300 Hz. Head localization  
374 coils were placed on the nasion, and in the left- and right-ear canals. The position of the head was  
375 recorded at the beginning of the experiment and was monitored, and adjusted during breaks using online  
376 head-position tracking if head motion exceeded 3 mm (Stolk et al., 2013). Eye-tracking was conducted  
377 throughout the experiment using an EyeLink 1000 eyetracker (SR Research Ltd, Ottawa, Canada),  
378 sampling at 2 kHz. Electrocardiogram (ECG) was recorded using two electrodes in a bipolar montage  
379 placed on the left collarbone, and right hip.

### 380 **Data Analysis**

#### 381 **Preprocessing**

382 Data analyses was conducted using the FieldTrip toolbox (Oostenveld et al., 2011) and custom Matlab  
383 scripts for Matlab 2014b (Mathworks, Nattick, USA). First, trials that included blinks during the baseline-  
384 or visual stimulation period were detected by bandpass filtering the horizontal, and vertical motion eye-  
385 tracker channels between 1 and 15 Hz (4<sup>th</sup> order, two-pass, Butterworth). Trials that exceeded a z-score of  
386 5 were rejected. Second, trials that included SQUID-jumps were detected by first high-pass filtering the  
387 data at 30 Hz (4<sup>th</sup> order, two-pass, Butterworth) to attenuate the stimulation artifact. Trials of which the  
388 first-order temporal derivative exceeded a z-score of 25 were rejected. This resulted in an average of 9%  
389  $\pm$  8% (Mean  $\pm$  SD) rejected trials per subject. The data were down-sampled to 600 Hz after epoching into  
390 trials from -3.4 to 3.6 seconds after onset of the gamma-inducing visual stimulus.

## TACS SUPPRESSES BEHAVIORALLY RELEVANT GAMMA OSCILLATIONS

391

### 392 **DICS beamforming**

393 A single-shell head model (Nolte, 2003) was created from the individual MRIs. Next, an equally-spaced  
394 grid with  $0.5 \text{ mm}^3$  based on a standard MNI template MRI with  $0.1 \text{ mm}^3$  resolution was created. This  
395 template grid was warped to each subject's individual anatomy to easily average and compare voxels  
396 across subjects. Then, a spatial filter was designed to maximize the sensitivity to the expected gamma-  
397 band response produced by the visual stimulation. To this end, we selected the trials without stimulation  
398 and epoched them into a baseline period of -2.0 to -0.001 s and an activation period from 0.4 to 2.399 s  
399 after visual stimulus onset, thus creating two epochs of exactly 2.0 s length. After removing linear trends,  
400 we calculated the cross-spectral density (CSD) matrix for both baseline and activation epochs, as well as  
401 for both epochs combined, at 60 Hz with 15 Hz frequency smoothing using a multi-taper approach, thus  
402 resulting in an analyzed frequency band of 45 – 75 Hz. A common spatial filter was calculated using a  
403 Dynamic Imaging of Coherent Sources (DICS) beamformer (Gross et al., 2001) on the CSD of the  
404 combined baseline and activation data using 5 % regularization. Note that the spatial filter was calculated  
405 on TACS-free Sham trials. The resulting spatial filter was then applied to the activation and baseline data  
406 separately. To find the voxels showing the maximal increase in gamma-band power in response to visual  
407 stimulation, the relative gamma-power change from baseline was calculated by dividing for each voxel in  
408 source space the absolute change from baseline by the baseline gamma power.

409

### 410 **LCMV virtual channels**

411 To enhance sensitivity to the visually induced gamma-band response, we used Linear Constrained  
412 Minimum Variance (LCMV) beamforming (Van Veen et al., 1997) to extract virtual channel time courses  
413 from those voxels that showed the strongest gamma-band power increase from baseline in each  
414 participant (Figure 1D) and were located inside the visual cortex mask of the AAL atlas (Tzourio-  
415 Mazoyer et al., 2002), including all striate and extra-striate regions (method adapted from Marshall et al.,  
416 2016). From these data, we created a new grid with 10 voxels. After bandpass-filtering (40 – 70 Hz) to

## TACS SUPPRESSES BEHAVIORALLY RELEVANT GAMMA OSCILLATIONS

417 maximize spatial filter sensitivity to the gamma-band, the covariance matrix was calculated for epochs  
418 from -2.3 to 2.3 s relative to visual stimulus onset on Sham trials, and spatial filters were calculated using  
419 5% regularization. The raw sensor-level data was multiplied by the resulting spatial filters to obtain  
420 virtual channel time courses for each of the 10 voxels in the grid. For each subsequent analysis, we first  
421 analyzed each of the 10 time courses separately before averaging the results per subject.

422

### 423 **FFT interpolation**

424 The main focus of the study was the effect of TACS in the alpha frequency-range on visually-induced  
425 gamma-band oscillations. Therefore, our original strategy was to ignore the artifact-loaded signal at the  
426 stimulation frequency itself and only analyze the gamma-band power modulation with respect to the  
427 known TACS phase. However, while TACS was applied at lower frequencies (range: 5 – 16 Hz) and thus  
428 well outside the stimulus-induced gamma-band of interest (i.e., 45 – 75 Hz), the magnitude of the TACS  
429 artifact in the MEG signal was orders of magnitude larger than the magnetic fields produced by the brain,  
430 and the higher harmonics of the TACS frequency still affected the gamma-band frequencies of interest  
431 (Supplementary Figure S1C). TACS artifacts and their harmonics could not be sufficiently suppressed by  
432 bandstop filters alone. LCMV spatial filters have previously been used to extract the brain signal of  
433 interest while attenuating the TCS artifact due to the suppression of correlated sources (e.g. Neuling et al.,  
434 2015; Marshall et al., 2016; Neuling et al., 2017), although a full suppression is mathematically  
435 impossible (Mäkelä et al., 2017). Unfortunately, we could not follow this approach, since LCMV spatial  
436 filter calculation based on TACS trials did not only suppress TACS artifacts, but also the stimulus-  
437 induced gamma-band response of interest: In fact, with that procedure, only 3 out of 17 participants still  
438 showed a clear gamma-band response during Sham trials, although the gamma-response is known to be  
439 very reliable (Hoogenboom et al., 2006a; Scheeringa et al., 2009; Scheeringa et al., 2011). In contrast,  
440 with our approach, only 2 out of 17 subjects did not show a visible gamma-band response. We therefore  
441 calculated LCMV spatial filters on Sham trials only, with the priority of preserving gamma-band  
442 responses in the visual cortex, while still attenuating TACS artifacts, though to a lesser degree. In addition,

## TACS SUPPRESSES BEHAVIORALLY RELEVANT GAMMA OSCILLATIONS

443 we employed an FFT interpolation approach (Figure S1C,D) previously used to attenuate line-noise in  
444 ECG recordings (Mewett et al., 2001) to effectively suppress the TACS frequency and its harmonics in all  
445 conditions. Data were transformed to the frequency domain using a Fast Fourier transform (FFT) with  
446 0.2 Hz frequency resolution (after zero-padding each trial to 5 s). Then, for each TACS trial the  
447 magnitude spectrum was interpolated from -1 to 1 Hz around the TACS frequency, and each of its  
448 harmonics up until the Nyquist frequency, while the phase spectrum remained intact. The interpolated  
449 frequency domain data was then transformed back into the time domain using an inverse FFT. As the  
450 effect of overall magnitude attenuation of the signal depended on the TACS frequency, we generated  
451 appropriate control conditions by applying the same FFT interpolation approach to copies of the Sham  
452 trials. The resulting frequency-specific Sham control conditions thus ensured fair comparisons even if  
453 harmonics inside the gamma frequency-band were interpolated.

454

### 455 **Time-Frequency Analysis**

456 To assess visual stimulus-induced gamma-band responses we calculated time-frequency representations  
457 (TFRs) of power by means of a sliding window FFT. For each trial, a sliding time window of 500 ms was  
458 moved in steps of 20 ms over the entire trial. The sliding time window was multiplied with a sequence of  
459 tapers (discrete prolate slepian sequence; dpss) to achieve a frequency smoothing of 10 Hz. Frequencies  
460 between 30 Hz and 100 Hz were analyzed in steps of 1 Hz. The data was zero-padded up to 10 seconds to  
461 achieve an artificial frequency resolution of 0.1 Hz. The mean and any linear trend were removed prior to  
462 calculating the FFT. The gamma-band response is usually best represented as relative change from  
463 baseline to account for its comparably low amplitude. During TACS trials, however, any residual noise in  
464 the baseline may thereby result in spuriously low ratios. We thus first subtracted the baseline (-1 to -0.2 s)  
465 from the activation period, effectively removing any residual frequency- and montage-specific TACS-  
466 related artifacts, as well as their heartbeat- and respiration-related modulation (Noury et al., 2016; but see  
467 Neuling et al., 2017), which per design were identical in baseline and visual activation periods of the  
468 same condition. We then calculated the log-ratio with respect to a common baseline period derived from

## TACS SUPPRESSES BEHAVIORALLY RELEVANT GAMMA OSCILLATIONS

469 the average of all Sham trials and thus unaffected by TACS-artifacts (ensuring a fair comparison of the  
470 gamma-band response between conditions and relative to Sham trials). An unbiased estimate of individual  
471 gamma peak frequency was derived by first calculating, for all conditions, the relative change in gamma  
472 power from Sham baseline, fitting a 23<sup>rd</sup> order polynomial to the average over all conditions, and  
473 identifying the largest peak within a range from 40 – 90 Hz using Matlab’s ‘findpeaks’ function. Relative  
474 gamma power was extracted per experimental condition from individual peak frequency bins and the time  
475 period from 0.5 to 1.5 s post visual stimulus onset and used for all subsequent analyses. Note that the  
476 attenuation of gamma power differs between frequency conditions based on the number of TACS  
477 harmonics in the gamma-band range that had to be interpolated in the frequency domain for artifact  
478 removal. However, the same procedure was applied to respective Sham trials, to guarantee a fair  
479 comparison. We used one-sample t-tests to test for significant gamma power responses relative to  
480 baseline, and a montage (occipital, frontal, sham) x TACS frequency (IAF-4, IAF, IAF+4 Hz) repeated-  
481 measures ANOVAs (with Greenhouse-Geisser correction for non-sphericity where necessary) on the  
482 baseline- and surrogate-corrected data, followed by paired-sample t-tests (with Bonferroni correction for  
483 multiple comparisons) were appropriate, to compare values between TACS montage and frequency  
484 conditions.

485

### 486 **Alpha Peak-Locked TFRs**

487 To assess whether TACS phasically modulated the power of the visually-induced gamma-band responses,  
488 we evaluated the gamma-band power dynamics in TACS peak-locked TFRs. To this end, we first  
489 calculated TFRs of each trial as described in the previous paragraph, but decreased the size of the sliding  
490 time window to 0.1 s to be more sensitive to transient changes in the gamma-band across the TACS cycle.  
491 Also, data were normalized per trial to allow robust single-trial assessment of phasic gamma power  
492 modulation for subsequent TACS-phase-gamma-amplitude-coupling analyses. To take variations in  
493 signal-to-noise ratio into account (e.g., due to residual artifacts), TFRs were z-normalized trial-by-trial by  
494 subtracting the mean and dividing by the standard deviation of the trial’s baseline, resulting in an estimate

## TACS SUPPRESSES BEHAVIORALLY RELEVANT GAMMA OSCILLATIONS

495 of time-locked power that is relatively robust against noisy trials and extreme values (see Grandchamp  
496 and Delorme (2011)).

497         Next, we detected the peaks of the TACS cycle in the output copy of the TACS signal as  
498 provided by the stimulation device, using Matlab's *findpeaks* function. Peaks were defined as the local  
499 maxima on the z-transformed stimulation signal with a minimum width of a quarter cycle of the  
500 stimulation signal, a minimum height of 1, and a minimum distance of 0.9 cycles. The data were epoched  
501 into segments around each peak with a duration of 4 cycles of the respective TACS frequency. For each  
502 TACS frequency, a comparable segmentation was also applied to the Sham trials, using randomly chosen  
503 stimulation signals from the respective TACS trials. This resulted in a specific Sham control condition for  
504 each TACS frequency, effectively providing a surrogate distribution of gamma power values relative to  
505 the TACS cycle. Finally, averages were created for each of the TACS frequencies and respective Sham  
506 surrogates. As the number of epochs depends on the number of cycles (being higher for higher  
507 frequencies), we applied a random subsampling approach to create unbiased averages. We first  
508 determined the stimulation frequency with the smallest number of epochs and then averaged 500  
509 randomly drawn subsamples of that size per condition. To allow direct comparison between TACS  
510 frequencies and averaging across subjects (with individualized IAF), we transformed the time-axis to  
511 radians by adjusting the step size during TFR calculation accordingly. Importantly, TACS peak-locked  
512 TFRs were calculated for both baseline and visual stimulation period. Since the baseline period does not  
513 contain any visually-induced gamma-band responses, but may contain residual TACS artifacts, it serves  
514 as an excellent control against TACS artifact-related spurious phase-amplitude coupling. Respective  
515 Sham TFRs were then subtracted from the TACS peak-locked TFRs, and individual gamma power values  
516 were compared for each phase angle (radians) with two-sided one-sampled t-tests against zero using FDR  
517 correction for multiple comparisons (Figure 2B and Figure S3).

## TACS SUPPRESSES BEHAVIORALLY RELEVANT GAMMA OSCILLATIONS

518

### 519 **Phase-Amplitude Coupling**

520 To more formally quantify and compare the extent to which TACS phasically modulates the gamma-band  
521 response, we estimated phase-amplitude coupling (PAC) using Tort's Modulation Index (MI) by  
522 calculating the normalized Kullback-Leibler (KL) divergence of the histogram of TACS phase-binned  
523 gamma amplitude to a uniform distribution (Tort et al., 2010). In case of significant PAC, the histogram  
524 diverges from a uniform distribution. To this end, the gamma-band amplitude was determined by  
525 convolving the virtual channel data between 0.5 and 1.5 s after visual stimulus onset with a 5-cycle  
526 moving time window multiplied with a Hanning taper for frequencies from 30 Hz to 100 Hz in steps of  
527 1 Hz, while a 1 second time window was used for estimating the phase of the TACS signal similarly to  
528 the gamma-band magnitude (Jiang et al., 2015). The phase-difference between the gamma-band power  
529 envelope and TACS signal was subsequently calculated and compared to a uniform distribution using  
530 Tort's Modulation Index (MI). As for TACS peak-locked TFRs, we randomly subsampled the data for  
531 each condition 500 times using a sample size equal to the lowest number of trials across conditions, to  
532 prevent any bias due to unequal trial numbers between conditions. MIs were calculated for each random  
533 subsample and then averaged. As a control, PAC was also estimated for surrogate data, for which the  
534 phase-providing TACS signal was randomly phase-shifted to create frequency-specific surrogate PAC  
535 values for each TACS condition. We used one-sample t-tests to test for significant PAC after subtracting  
536 PAC values at baseline before visual stimulus onset and respective visual-stimulation induced changes in  
537 surrogate PAC values. We used repeated-measures ANOVAs (no correction for non-sphericity was  
538 necessary) on the baseline- and TACS-corrected data, followed by paired-sample t-tests were appropriate,  
539 to compare PAC between TACS montage and frequency conditions.

540

### 541 **References**

## TACS SUPPRESSES BEHAVIORALLY RELEVANT GAMMA OSCILLATIONS

- 542 Alekseichuk I, Turi Z, Amador de Lara G, Antal A, Paulus W (2016) Spatial Working Memory in  
543 Humans Depends on Theta and High Gamma Synchronization in the Prefrontal Cortex.  
544 *Curr Biol*.
- 545 Ali MM, Sellers KK, Frohlich F (2013) Transcranial alternating current stimulation modulates  
546 large-scale cortical network activity by network resonance. *J Neurosci* 33:11262-11275.
- 547 Antal A, Herrmann CS (2016) Transcranial Alternating Current and Random Noise Stimulation:  
548 Possible Mechanisms. *Neural plasticity* 2016:3616807.
- 549 Bastos AM, Vezoli J, Bosman CA, Schoffelen JM, Oostenveld R, Dowdall JR, De Weerd P,  
550 Kennedy H, Fries P (2015) Visual areas exert feedforward and feedback influences  
551 through distinct frequency channels. *Neuron* 85:390-401.
- 552 Bergmann TO, Karabanov A, Hartwigsen G, Thielscher A, Siebner HR (2016) Combining non-  
553 invasive transcranial brain stimulation with neuroimaging and electrophysiology: Current  
554 approaches and future perspectives. *Neuroimage* 140:4-19.
- 555 Brittain JS, Probert-Smith P, Aziz TZ, Brown P (2013) Tremor suppression by rhythmic  
556 transcranial current stimulation. *Curr Biol* 23:436-440.
- 557 Cecere R, Rees G, Romei V (2015) Individual differences in alpha frequency drive crossmodal  
558 illusory perception. *Curr Biol* 25:231-235.
- 559 Fries P (2015) Rhythms for Cognition: Communication through Coherence. *Neuron* 88:220-235.
- 560 Grandchamp R, Delorme A (2011) Single-trial normalization for event-related spectral  
561 decomposition reduces sensitivity to noisy trials. *Front Psychol* 2:236.
- 562 Gross J, Kujala J, Hamalainen M, Timmermann L, Schnitzler A, Salmelin R (2001) Dynamic  
563 imaging of coherent sources: Studying neural interactions in the human brain. *Proc Natl*  
564 *Acad Sci U S A* 98:694-699.
- 565 Helfrich RF, Herrmann CS, Engel AK, Schneider TR (2016) Different coupling modes mediate  
566 cortical cross-frequency interactions. *Neuroimage* 140:76-82.
- 567 Helfrich RF, Schneider TR, Rach S, Trautmann-Lengsfeld SA, Engel AK, Herrmann CS (2014a)  
568 Entrainment of brain oscillations by transcranial alternating current stimulation. *Curr Biol*  
569 24:333-339.
- 570 Helfrich RF, Knepper H, Nolte G, Struber D, Rach S, Herrmann CS, Schneider TR, Engel AK  
571 (2014b) Selective Modulation of Interhemispheric Functional Connectivity by HD-tACS  
572 Shapes Perception. *PLoS Biol* 12:e1002031.
- 573 Hoogenboom N, Schoffelen J-M, Oostenveld R, Parkes LM, Fries P (2006a) Localizing human  
574 visual gamma-band activity in frequency, time and space. *NeuroImage* 29:764-773.
- 575 Hoogenboom N, Schoffelen JM, Oostenveld R, Parkes LM, Fries P (2006b) Localizing human  
576 visual gamma-band activity in frequency, time and space. *Neuroimage* 29:764-773.
- 577 Horvath JC, Forte JD, Carter O (2014) Evidence that transcranial direct current stimulation  
578 (tDCS) generates little-to-no reliable neurophysiologic effect beyond MEP amplitude  
579 modulation in healthy human subjects: A systematic review. *Neuropsychologia* 66C:213-  
580 236.
- 581 Horvath JC, Forte JD, Carter O (2015) Quantitative Review Finds No Evidence of Cognitive  
582 Effects in Healthy Populations From Single-session Transcranial Direct Current  
583 Stimulation (tDCS). *Brain Stimul* 8:535-550.
- 584 Jensen O, Mazaheri A (2010) Shaping functional architecture by oscillatory alpha activity: gating  
585 by inhibition. *Front Hum Neurosci* 4:186.
- 586 Jiang H, Bahramisharif A, van Gerven MA, Jensen O (2015) Measuring directionality between  
587 neuronal oscillations of different frequencies. *Neuroimage* 118:359-367.



## TACS SUPPRESSES BEHAVIORALLY RELEVANT GAMMA OSCILLATIONS

- 588 Joundi RA, Jenkinson N, Brittain JS, Aziz TZ, Brown P (2012) Driving oscillatory activity in the  
589 human cortex enhances motor performance. *Curr Biol* 22:403-407.
- 590 Klimesch W, Sauseng P, Hanslmayr S (2007) EEG alpha oscillations: the inhibition-timing  
591 hypothesis. *Brain Res Rev* 53:63-88.
- 592 Mäkelä N, Sarvas J, Ilmoniemi RJ (2017) Proceedings #17. A simple reason why beamformer  
593 may (not) remove the tACS-induced artifact in MEG. *Brain Stimulation* 10:e66-e67.
- 594 Marshall TR, Esterer S, Herring JD, Bergmann TO, Jensen O (2016) On the relationship between  
595 cortical excitability and visual oscillatory responses - A concurrent tDCS-MEG study.  
596 *Neuroimage* 140:41-49.
- 597 Mewett DT, Nazeran H, Reynolds KJ (2001) Removing power line noise from recorded EMG.  
598 In: *Engineering in Medicine and Biology Society, 2001. Proceedings of the 23rd Annual*  
599 *International Conference of the IEEE*, pp 2190-2193: IEEE.
- 600 Neuling T, Rach S, Wagner S, Wolters CH, Herrmann CS (2012) Good vibrations: Oscillatory  
601 phase shapes perception. *Neuroimage* 63:771-778.
- 602 Neuling T, Ruhnau P, Weisz N, Herrmann CS, Demarchi G (2017) Faith and oscillations  
603 recovered: On analyzing EEG/MEG signals during tACS. *Neuroimage* 147:960-963.
- 604 Neuling T, Ruhnau P, Fusca M, Demarchi G, Herrmann CS, Weisz N (2015) Friends, not foes:  
605 Magnetoencephalography as a tool to uncover brain dynamics during transcranial  
606 alternating current stimulation. *Neuroimage* 118:406-413.
- 607 Nolte G (2003) The magnetic lead field theorem in the quasi-static approximation and its use for  
608 magnetoencephalography forward calculation in realistic volume conductors. *Phys Med*  
609 *Biol* 48:3637-3652.
- 610 Noury N, Siegel M (2017) Analyzing EEG and MEG signals recorded during tES, a reply.  
611 *Neuroimage* 167:53-61.
- 612 Noury N, Hipp JF, Siegel M (2016) Physiological processes non-linearly affect  
613 electrophysiological recordings during transcranial electric stimulation. *Neuroimage* in  
614 press.
- 615 Oostenveld R, Fries P, Maris E, Schoffelen J-M (2011) FieldTrip: open source software for  
616 advanced analysis of MEG, EEG, and invasive electrophysiological data. *Computational*  
617 *intelligence and neuroscience* 2011:1.
- 618 Opitz A, Falchier A, Linn GS, Milham MP, Schroeder CE (2017) Limitations of ex vivo  
619 measurements for in vivo neuroscience. *Proc Natl Acad Sci U S A*.
- 620 Opitz A, Falchier A, Yan CG, Yeagle EM, Linn GS, Megevand P, Thielscher A, Deborah AR,  
621 Milham MP, Mehta AD, Schroeder CE (2016) Spatiotemporal structure of intracranial  
622 electric fields induced by transcranial electric stimulation in humans and nonhuman  
623 primates. *Scientific reports* 6:31236.
- 624 Osipova D, Hermes D, Jensen O (2008) Gamma power is phase-locked to posterior alpha activity.  
625 *PLoS One* 3:e3990.
- 626 Pogosyan A, Gaynor LD, Eusebio A, Brown P (2009) Boosting cortical activity at Beta-band  
627 frequencies slows movement in humans. *Curr Biol* 19:1637-1641.
- 628 Schalk G (2015) A general framework for dynamic cortical function: the function-through-  
629 biased-oscillations (FBO) hypothesis. *Front Hum Neurosci* 9:352.
- 630 Scheeringa R, Mazaheri A, Bojak I, Norris DG, Kleinschmidt A (2011) Modulation of visually  
631 evoked cortical fMRI responses by phase of ongoing occipital alpha oscillations. *Journal*  
632 *of Neuroscience* 31:3813-3820.

## TACS SUPPRESSES BEHAVIORALLY RELEVANT GAMMA OSCILLATIONS

- 633 Scheeringa R, Petersson KM, Oostenveld R, Norris DG, Hagoort P, Bastiaansen MC (2009)  
634 Trial-by-trial coupling between EEG and BOLD identifies networks related to alpha and  
635 theta EEG power increases during working memory maintenance. *NeuroImage* 44:1224-  
636 1238.
- 637 Schutter DJ (2015) Cutaneous retinal activation and neural entrainment in transcranial  
638 alternating current stimulation: A systematic review. *Neuroimage*.
- 639 Soekadar SR, Witkowski M, Cossio EG, Birbaumer N, Robinson SE, Cohen LG (2013) In vivo  
640 assessment of human brain oscillations during application of transcranial electric currents.  
641 *Nat Commun* 4:2032.
- 642 Spaak E, Bonnefond M, Maier A, Leopold DA, Jensen O (2012) Layer-Specific Entrainment of  
643 Gamma-Band Neural Activity by the Alpha Rhythm in Monkey Visual Cortex. *Curr Biol*.
- 644 Stolk A, Todorovic A, Schoffelen J-M, Oostenveld R (2013) Online and offline tools for head  
645 movement compensation in MEG. *NeuroImage* 68:39-48.
- 646 Tort AB, Komorowski R, Eichenbaum H, Kopell N (2010) Measuring phase-amplitude coupling  
647 between neuronal oscillations of different frequencies. *Journal of neurophysiology*  
648 104:1195-1210.
- 649 Tzourio-Mazoyer N, Landeau B, Papathanassiou D, Crivello F, Etard O, Delcroix N, Mazoyer B,  
650 Joliot M (2002) Automated anatomical labeling of activations in SPM using a  
651 macroscopic anatomical parcellation of the MNI MRI single-subject brain. *NeuroImage*  
652 15:273-289.
- 653 Underwood E (2016) NEUROSCIENCE. Cadaver study challenges brain stimulation methods.  
654 *Science* 352:397.
- 655 Van Veen BD, van Drongelen W, Yuchtman M, Suzuki A (1997) Localization of brain electrical  
656 activity via linearly constrained minimum variance spatial filtering. *IEEE Trans Biomed*  
657 *Eng* 44:867-880.
- 658 Watson AB, Pelli DG (1983) QUEST: A Bayesian adaptive psychometric method. *Attention,*  
659 *Perception, & Psychophysics* 33:113-120.
- 660 Witkowski M, Cossio EG, Chander BS, Braun C, Birbaumer N, Robinson SE, Soekadar SR  
661 (2015) Mapping entrained brain oscillations during transcranial alternating current  
662 stimulation (tACS). *Neuroimage*.
- 663
- 664

## TACS SUPPRESSES BEHAVIORALLY RELEVANT GAMMA OSCILLATIONS

665

### Supplemental Tables and Figures

666

667 **Table S1.** *Visual stimulus-induced gamma power.* Table contains mean ( $\pm$  SEM) for visual stimulus-induced gamma  
668 power, calculated per condition by subtracting individual gamma power values of the respective 'baseline' period  
669 before visual stimulation from the 'activation' period during of visual stimulation and subsequently dividing those  
670 differences by the individual baseline of the Sham condition to normalize for power differences across subjects.  
671 Right columns contain t-statistics and p-values for one-sample t-tests against zero. All means were significantly  
672 different from zero, indicating an increase in gamma-band power being evident in all conditions relative to a  
673 common pre-visual-stimulus baseline as derived from Sham trials.

#### One Sample T-Tests

|                       | Mean  | SE    | t     | df | p      |
|-----------------------|-------|-------|-------|----|--------|
| Occipital: IAF - 4 Hz | 0.095 | 0.016 | 5.964 | 14 | < .001 |
| Occipital: IAF        | 0.108 | 0.020 | 5.356 | 14 | < .001 |
| Occipital: IAF + 4 Hz | 0.122 | 0.018 | 6.920 | 14 | < .001 |
| Frontal: IAF - 4 Hz   | 0.158 | 0.019 | 7.453 | 14 | < .001 |
| Frontal: IAF          | 0.152 | 0.020 | 7.490 | 14 | < .001 |
| Frontal: IAF + 4 Hz   | 0.156 | 0.020 | 7.823 | 14 | < .001 |
| Sham: IAF - 4 Hz      | 0.155 | 0.021 | 8.140 | 14 | < .001 |
| Sham: IAF             | 0.157 | 0.020 | 7.448 | 14 | < .001 |
| Sham: IAF + 4 Hz      | 0.158 | 0.021 | 7.845 | 14 | < .001 |

Note. Student's t-test.

674

675 **Table S2.** *Difference of visual stimulus-induced gamma power relative to Sham trials.* Table contains comparisons  
676 of gamma power responses at individual peak gamma frequency (see Table S1) between TACS and Sham trials.  
677 Right columns contain t-statistics and p-values for paired-sample t-tests. For all stimulation frequencies, occipital  
678 but not frontal control TACS caused a significant reduction of visual stimulus-induced gamma power.

#### Paired Samples T-Tests

|                                          | t      | df | p      |
|------------------------------------------|--------|----|--------|
| Occipital: IAF - 4 Hz - Sham: IAF - 4 Hz | -6.034 | 14 | < .001 |
| Occipital: IAF - Sham: IAF               | -4.317 | 14 | < .001 |
| Occipital: IAF + 4 Hz - Sham: IAF + 4 Hz | -3.112 | 14 | .008   |
| Frontal: IAF - 4 Hz - Sham: IAF - 4 Hz   | 0.455  | 14 | 0.656  |
| Frontal: IAF - Sham: IAF                 | -0.919 | 14 | 0.374  |
| Frontal: IAF + 4 Hz - Sham: IAF + 4 Hz   | -0.363 | 14 | 0.722  |

Note. Student's t-test.

679

680

## TACS SUPPRESSES BEHAVIORALLY RELEVANT GAMMA OSCILLATIONS

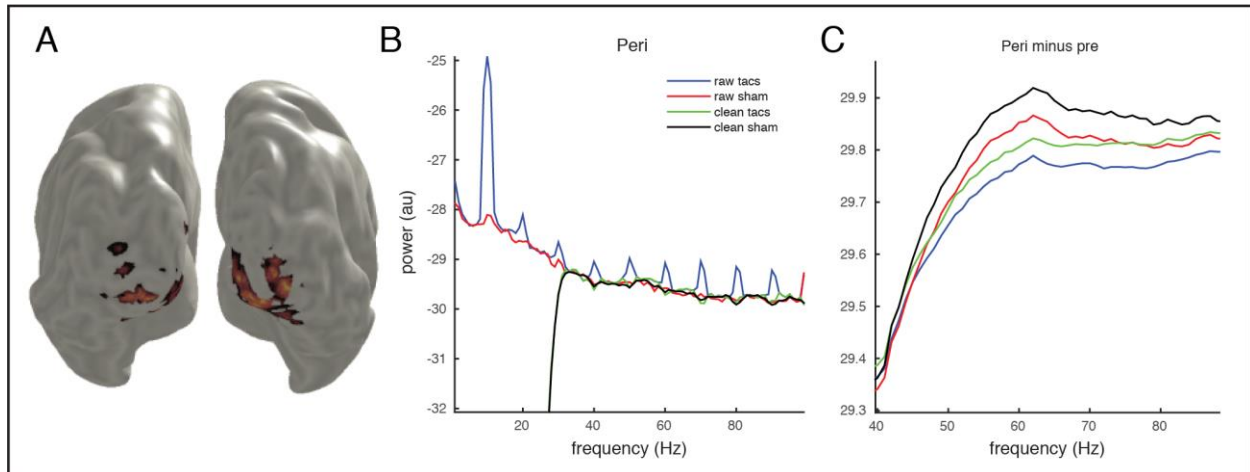

681

682 **Figure S1. Voxel selection and cleaning.** (A) Virtual channels were extracted from the 10 voxels, in the visual  
683 cortex, showing the highest increase in gamma-band power from baseline in response to visual stimulation. Warm  
684 colors in the transversal slice indicate areas showing increased gamma-band activity due to visual stimulation. (B)  
685 Power spectrum (0.5-1.5 s peri-stimulus period, zero-padded to 10 seconds, Hanning taper) for a representative  
686 subject from a single 10 Hz TACS trial before (Raw; blue and red trace) and after (FFT interpolated; green and  
687 black trace) artifact suppression. (C) Same as in B, but for the difference between peri- and pre-stimulus periods  
688 (multitapered, as in TFR). The absence of visible artifacts at the harmonics of the stimulation frequency suggests  
689 that the peri-pre subtraction approach and the high-pass filter were already able to remove most of the artifacts (even  
690 without FFT interpolation.  
691

## TACS SUPPRESSES BEHAVIORALLY RELEVANT GAMMA OSCILLATIONS

692

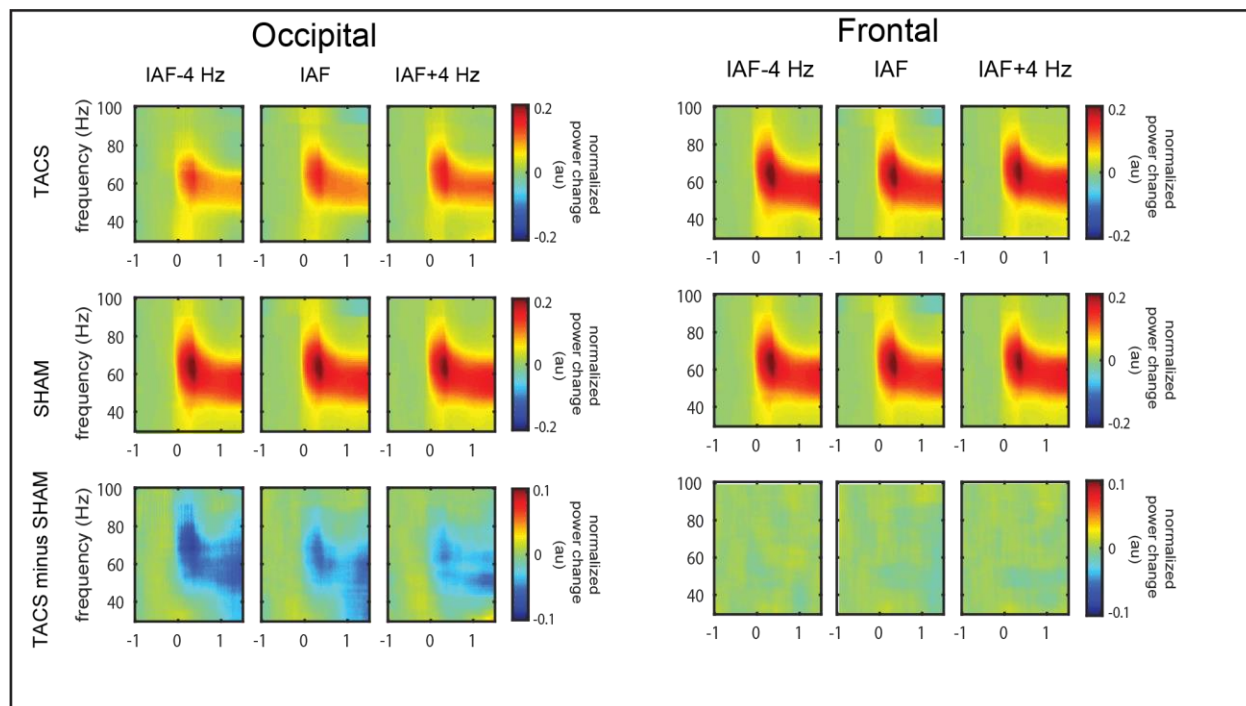

693

694 **Figure S2. Occipital TACS suppresses visually-induced gamma-band response.** TFRs show the visually-  
695 induced gamma-band responses for occipital (left panel) and frontal (right panel) TACS, as well as all  
696 stimulation frequencies (columns), including corresponding Sham trials. The bottom row represents the difference  
697 between respective TACS and Sham trials.  
698

## TACS SUPPRESSES BEHAVIORALLY RELEVANT GAMMA OSCILLATIONS

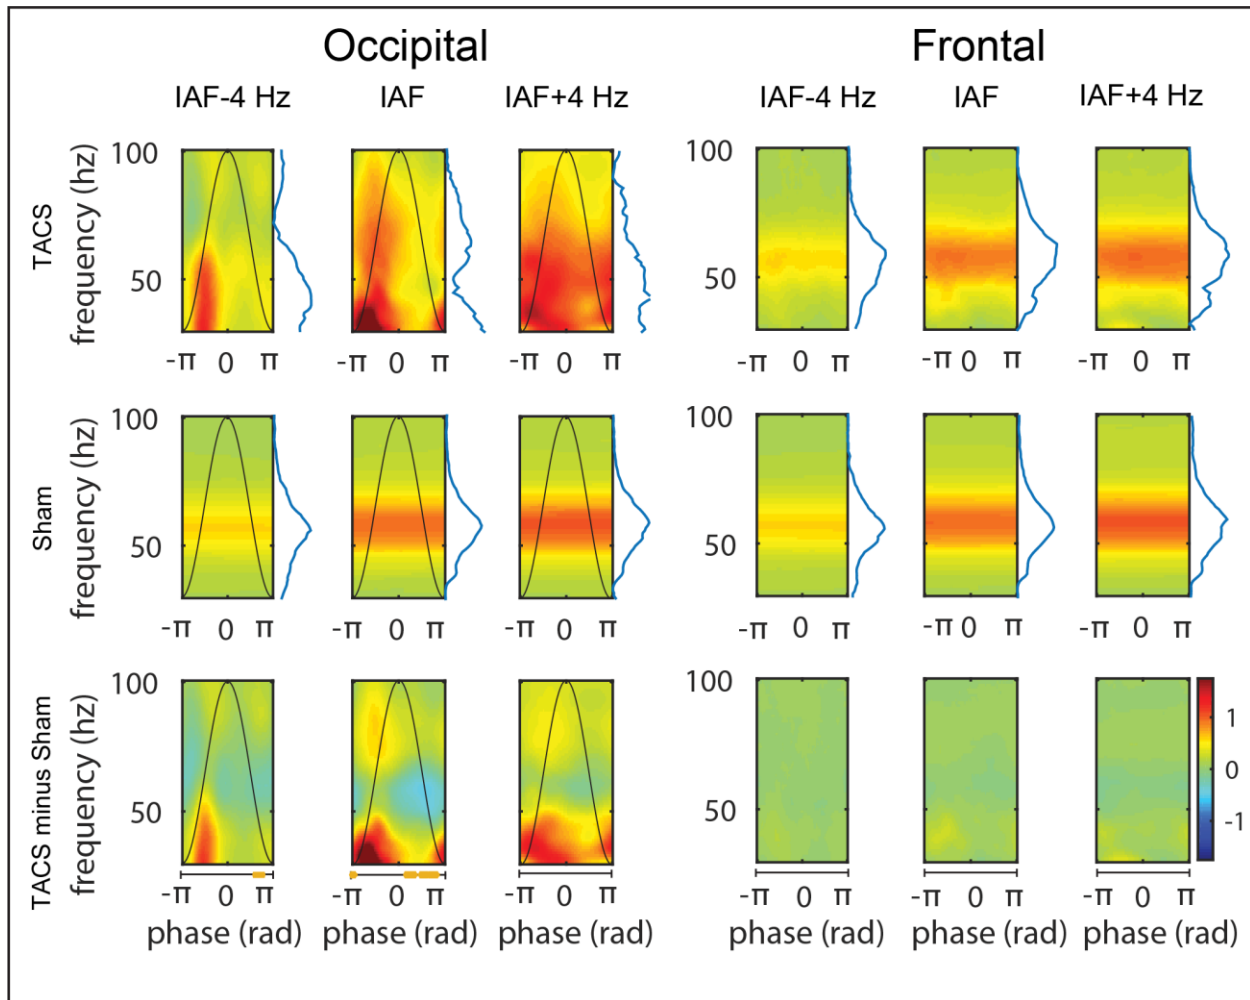

699

700 **Figure S3. Occipital TACS physically modulates visually-induced gamma-band response.** TACS peak-locked  
 701 TFRs show gamma-band amplitude sorted according to phase of TACS. Note that some of the apparent differences  
 702 between TFRs for different frequencies (cf. columns of middle row, representing Sham trials) are partially due to the  
 703 different cycle length (i.e. time window) that had been normalized into radians as longer segments are accompanied  
 704 with less frequency smoothing. However, respective Sham trials have been treated the same way and comparisons to  
 705 Sham thus correct for this effect. Only occipital stimulation shows a clear modulation of gamma-band amplitude  
 706 according to TACS phase (orange bars underneath TFR indicate significant difference from zero,  $p_{FDR} < 0.05$ ). The  
 707 bottom row represents the difference between the TACS and Sham trials.  
 708

## TACS SUPPRESSES BEHAVIORALLY RELEVANT GAMMA OSCILLATIONS

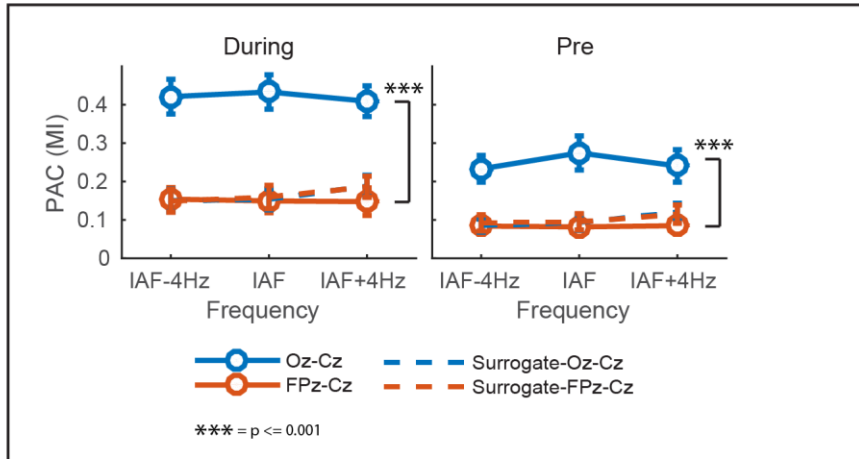

709  
710  
711  
712  
713  
714

**Figure S4. Gamma-band activity phase-coupled to TACS for occipital stimulation.** Both during visual stimulation (left) and to a smaller degree also before visual stimulus onset (right), modulation index (MI) analyses revealed increased phase-amplitude coupling (PAC) for occipital TACS relative to both frontal control TACS and surrogate data, whereas PAC for frontal TACS did not differ from surrogate PAC.
